# Supplementary material
Source: PubMed Central journal article supplement (PMC1765427)

# Increase in Heart-Weight/Body-Weight

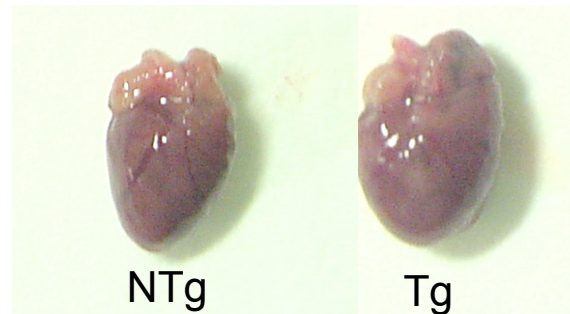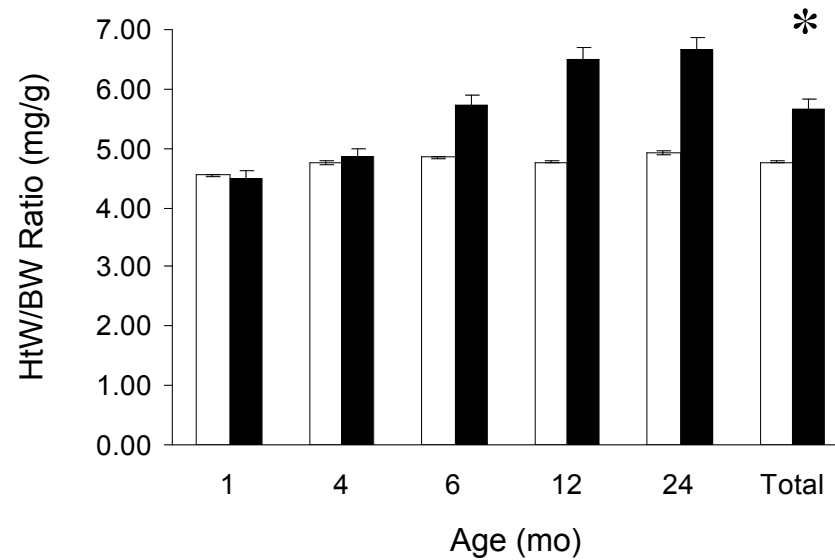

Supplement: pnas_0605635103_1.pdf [file pnas_0605635103_1.pdf]
